# Supplementary material for: Multi-Omics Analyses to Identify FCGBP as a Potential Predictor in Head and Neck Squamous Cell Carcinoma
Source: MDPI journal article supplement (doi:10.3390/diagnostics12051178), 2022-05-09
Supplement: s1 [file s1]

## Supplementary documentation

### Supplementary Tables

**Table S1.** Correlations between *FCGBP* alterations and top altered genes in HNSC patients ( $n = 522$ )

| A Gene Symbol | B Gene Symbol | Neither | A Not B | B Not A | Both | Log2 (OR) | <i>q</i> -Value | Tendency      |
|---------------|---------------|---------|---------|---------|------|-----------|-----------------|---------------|
| <i>TP53</i>   | <i>CDKN2A</i> | 112     | 139     | 44      | 214  | 1.970     | < 0.001         | Co-occurrence |
| <i>CDKN2A</i> | <i>FAT1</i>   | 201     | 165     | 50      | 93   | 1.180     | < 0.001         | Co-occurrence |
| <i>TP53</i>   | <i>FAT1</i>   | 126     | 240     | 30      | 113  | 0.984     | 0.009           | Co-occurrence |
| <i>TTN</i>    | <i>SI</i>     | 253     | 167     | 39      | 50   | 0.958     | 0.012           | Co-occurrence |
| <i>FCGBP</i>  | <i>FAT1</i>   | 354     | 12      | 129     | 14   | 1.679     | 0.012           | Co-occurrence |
| <i>FCGBP</i>  | <i>SI</i>     | 404     | 16      | 79      | 10   | 1.676     | 0.019           | Co-occurrence |
| <i>TP53</i>   | <i>TTN</i>    | 102     | 190     | 54      | 163  | 0.696     | 0.020           | Co-occurrence |
| <i>FCGBP</i>  | <i>TP53</i>   | 153     | 3       | 330     | 23   | 1.830     | 0.037           | Co-occurrence |

**HNSC:** head-neck squamous cell carcinoma; ***TP53*:** tumor protein p53; ***CDKN2A*:** cyclin-dependent kinase inhibitor; ***TTN*:** titin; ***SI*:** sucrose-isomaltase; ***FCGBP*:** Fc gamma binding protein; **OR:** Odds Ratio

**Table S2.** Intersection analysis of interacted proteins with *FCGBP* and *FCGBP*-associated co-expressed genes

| Gene Symbol     | Combined Score | <sup>1</sup> <i>p</i> -Value (co-Expressed Genes) | <sup>2</sup> mRNA Correlation | <i>p</i> -Value (mRNA Correlation) |
|-----------------|----------------|---------------------------------------------------|-------------------------------|------------------------------------|
| <i>TFF3</i>     | 0.983          | 8.27E-17                                          | 0.357                         | 3.02E-16                           |
| <i>CLCA1</i>    | 0.789          | *                                                 | -0.003                        | *                                  |
| <i>CDHR5</i>    | 0.731          | *                                                 | 0.069                         | *                                  |
| <i>CHURC1</i>   | 0.689          | *                                                 | 0.087                         | *                                  |
| <i>NPTX2</i>    | 0.654          | *                                                 | 0.057                         | *                                  |
| <i>PCDH17</i>   | 0.629          | *                                                 | 0.112                         | 1.32E-02                           |
| <i>NAALADL1</i> | 0.593          | 6.29E-08                                          | 0.304                         | 6.01E-12                           |
| <i>ZG16</i>     | 0.583          | 4.72E-03                                          | -0.144                        | 1.40E-03                           |
| <i>C1QC</i>     | 0.574          | 5.93E-03                                          | 0.178                         | 7.40E-05                           |
| <i>NPAS4</i>    | 0.555          | *                                                 | 0.13                          | 3.74E-03                           |

<sup>1</sup>***p* value in co-expressed genes:** *p* value of mRNA correlation between *FCGBP* and *FCGBP*-associated co-expressed genes by LinkedOmics; <sup>2</sup>**mRNA correlation:** R value of Spearman's correlation by TIMER2.0.

\**p* > 0.05

## Supplementary Figures

Figure S1.

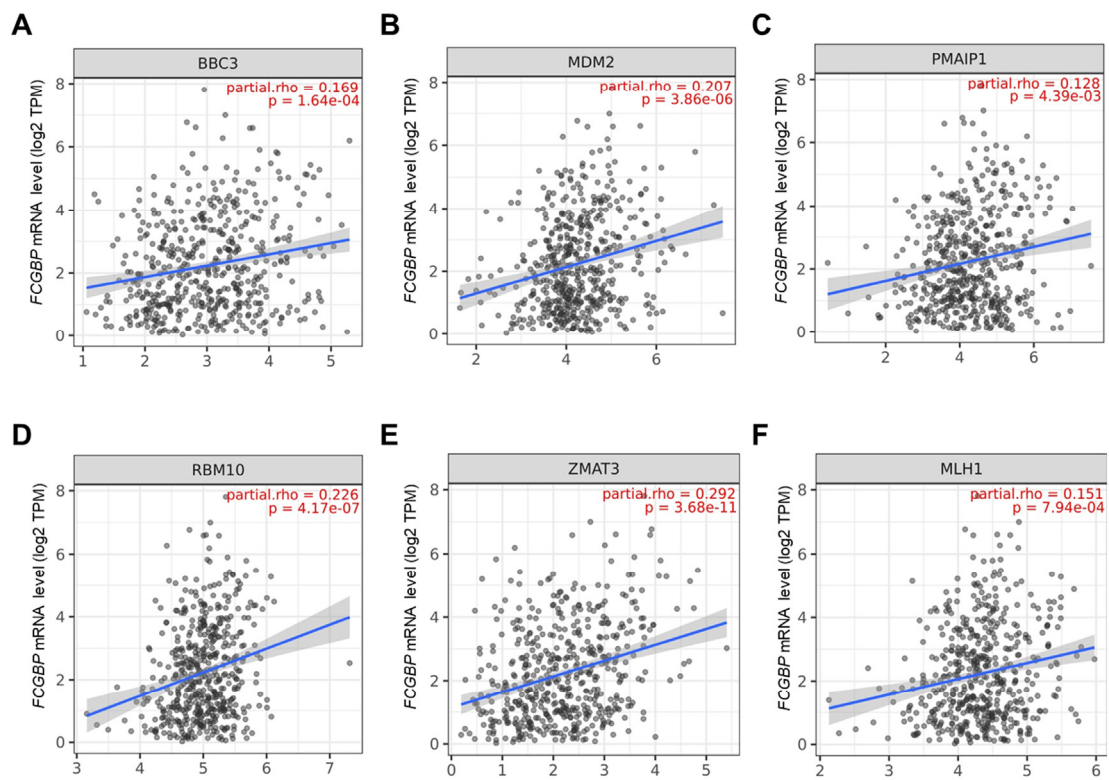

**Figure S1.** The correlations between *FCGBP* and the target genes of *TP53*.

(A–F) *FCGBP* is positively associated with *BBC3*, *MDM2*, *PMAIP1*, *RBM10*, *ZMAT3*, and *MLH1*.

**Figure S2.**

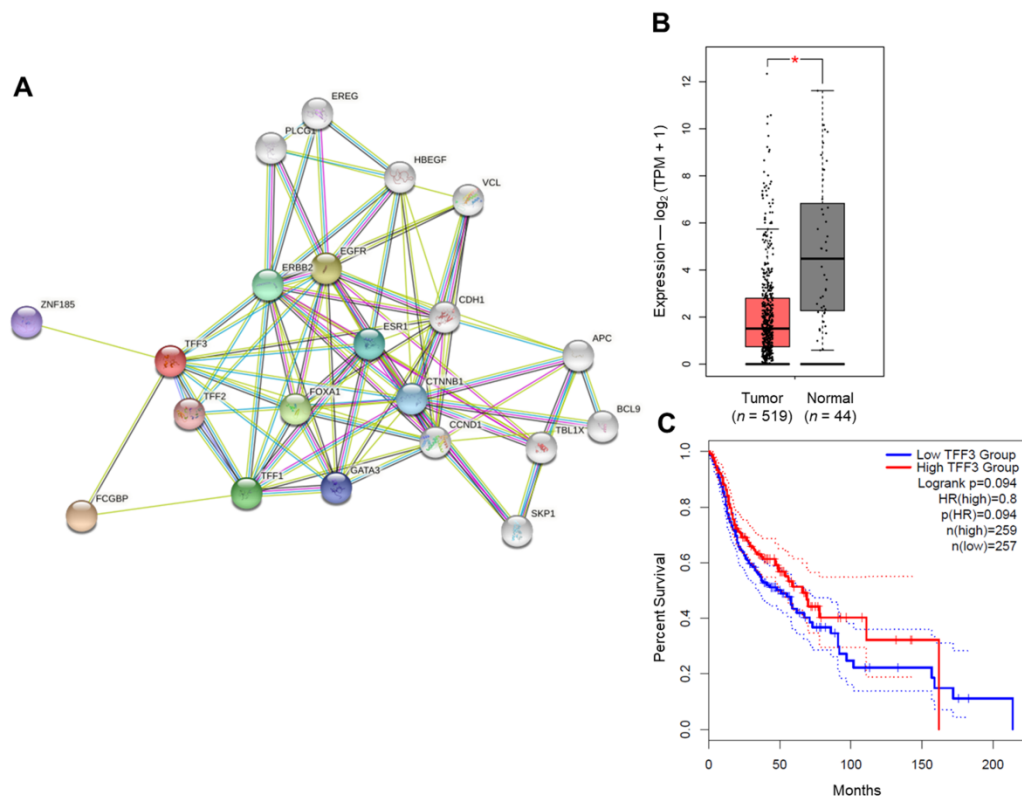

**Figure S2.** The interacting network, expression levels, and survival analysis of TFF3. (A) Close interaction between TFF3 and EGFR. (B) The expression level of *TFF3* in patients with HNSC (GEPIA2). (C) Kaplan-Meier curve showed overall survival of HNSC patients with high *TFF3* and low *TFF3* levels.

**Figure S3.**

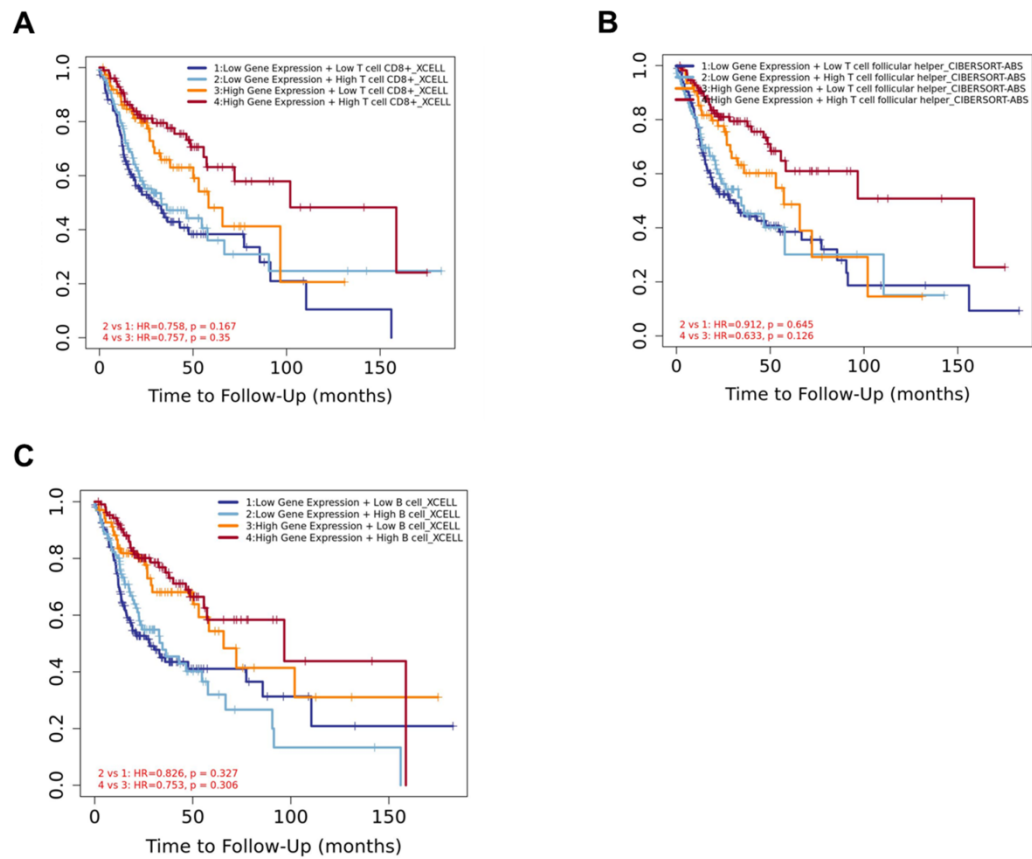

**Figure S3.** Survival analyses by high- and low- levels of *FCGBP* and infiltration rates of immune cells.

(A–C) The prognostic values of infiltration levels of CD8+, follicular helper T cells, and B cells by different *FCGBP* expressions.
